CORRECTION

# Correction: Making Sense of Residues on Flaked Stone Artefacts: Learning from Blind Tests

Veerle Rots, Elspeth Hayes, Dries Cnuts, Christian Lepers, Richard Fullagar

The image for [Fig 14](#) is incorrect. Please see the correct [Fig 14](#) here.

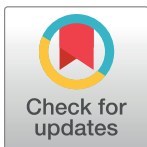

## OPEN ACCESS

**Citation:** Rots V, Hayes E, Cnuts D, Lepers C, Fullagar R (2017) Correction: Making Sense of Residues on Flaked Stone Artefacts: Learning from Blind Tests. PLoS ONE 12(5): e0178311. <https://doi.org/10.1371/journal.pone.0178311>

**Published:** May 18, 2017

**Copyright:** © 2017 Rots et al. This is an open access article distributed under the terms of the [Creative Commons Attribution License](#), which permits unrestricted use, distribution, and reproduction in any medium, provided the original author and source are credited.

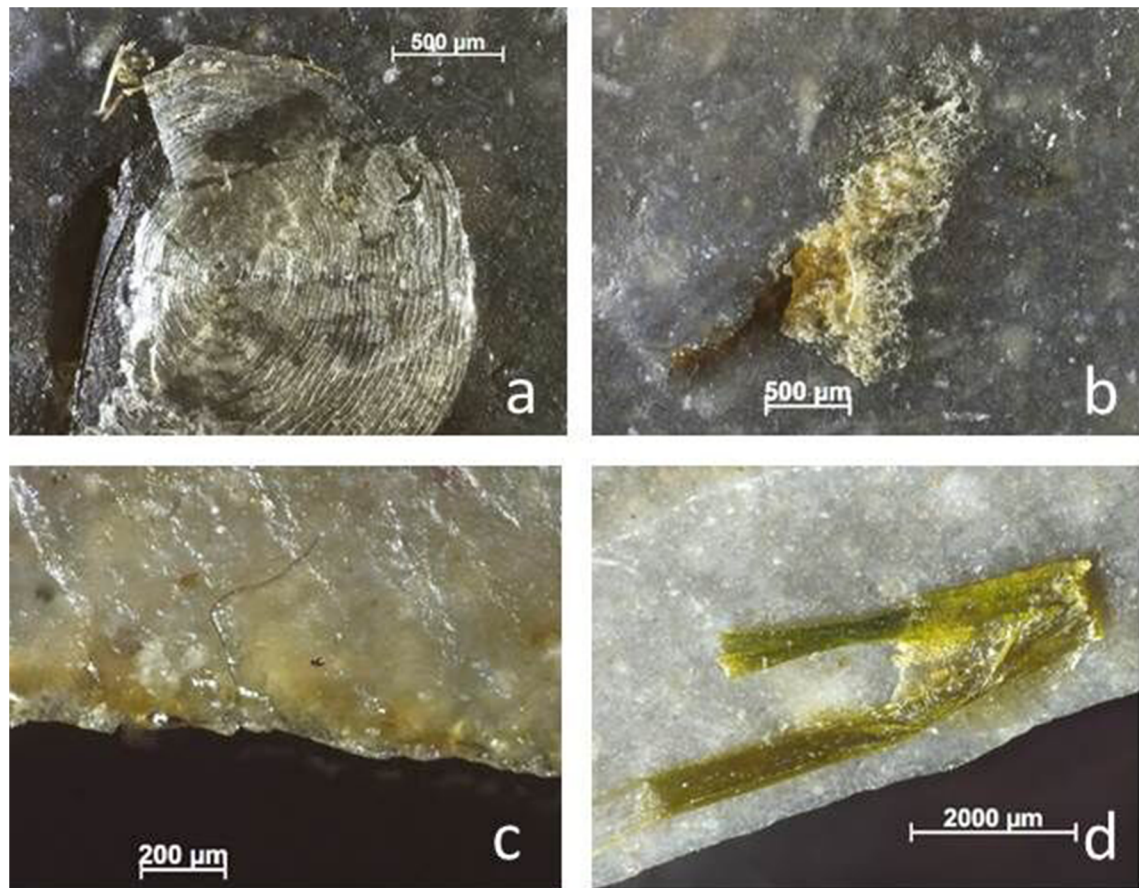

**Fig 14. Residues identified on BT3 (processing fish) as described during blind test.** a) Fish scale on the ventral surface of the flake, acquired during use; b) possible dried fish collagen, also on the ventral surface; acquired during use; c) fatty and greasy use residues (*cf.* blood and collagen), acquired during use; d) unidentified green fibre, possibly grass, with a fish scale beneath it.

<https://doi.org/10.1371/journal.pone.0178311.g001>

## Reference

1. Rots V, Hayes E, Cnuts D, Lepers C, Fullagar R (2016) Making Sense of Residues on Flaked Stone Artefacts: Learning from Blind Tests. *PLoS ONE* 11(3): e0150437. doi:[10.1371/journal.pone.0150437](https://doi.org/10.1371/journal.pone.0150437) PMID: [26930210](https://pubmed.ncbi.nlm.nih.gov/26930210/)
